# Supplementary material
Source: PubMed Central journal article supplement (PMC3156657)
Supplement: neo1308_0664SD1.pdf [file neo1308_0664SD1.pdf]

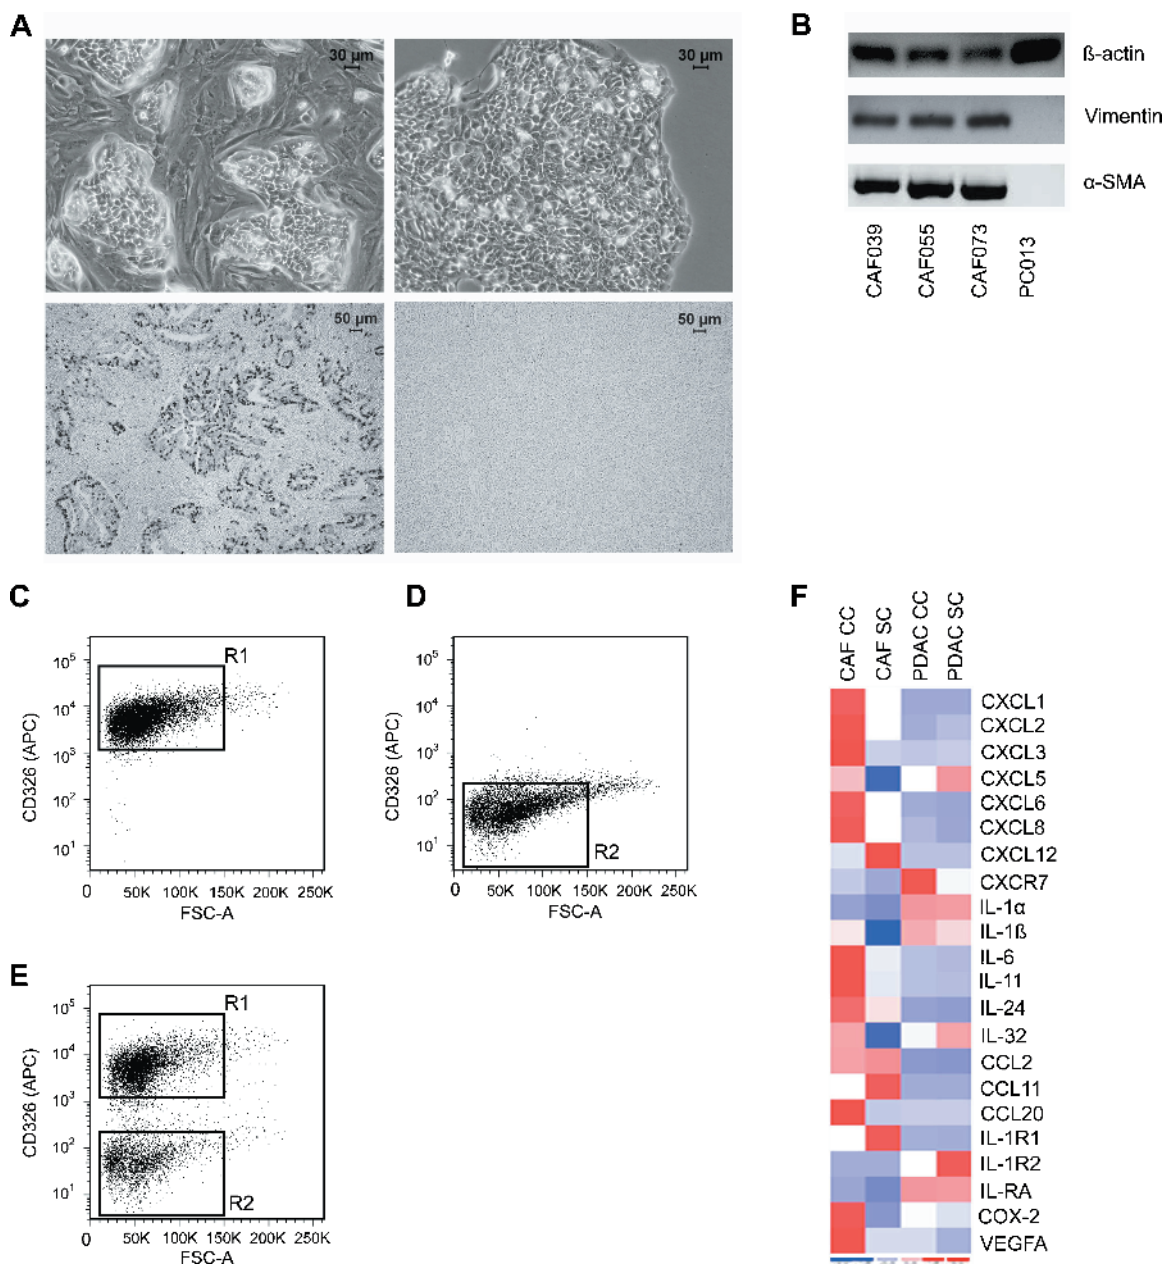

**Figure W1.** Characterization of primary PDAC and CAF cell lines propagated from tumor tissues. (A) Visualization of PC013 and CAF039 cell lines cocultured together *in vitro* for 5 days. Pancreatic tumor tissue from a PDAC patient and normal tissue stained with Ki-67. Size bars, 50 and 30  $\mu\text{m}$ . (B) RNA extracted from the CAF cell lines CAF039, CAF055, and CAF073 and the primary PDAC cell line PC013 were assessed for  $\alpha$ -SMA and vimentin expression by PCR followed by gel electrophoresis to visualize the gene products. (C) Singly cultured PDAC cell line, (D) CAFs, and (E) cocultured PDAC and CAFs all assessed for anti-CD326 APC-labeled MAb and analyzed by flow cytometry. (E) PDAC cells were sorted from the R1 gate and CAFs were sorted from the R2 gate. (F) Gene array heat map from a representative experiment showing single and cocultured PC013 and CAF039 cells. The cocultured cells were labeled with CD326 and sorted into pure cell populations, and data were analyzed by d-Chip software.

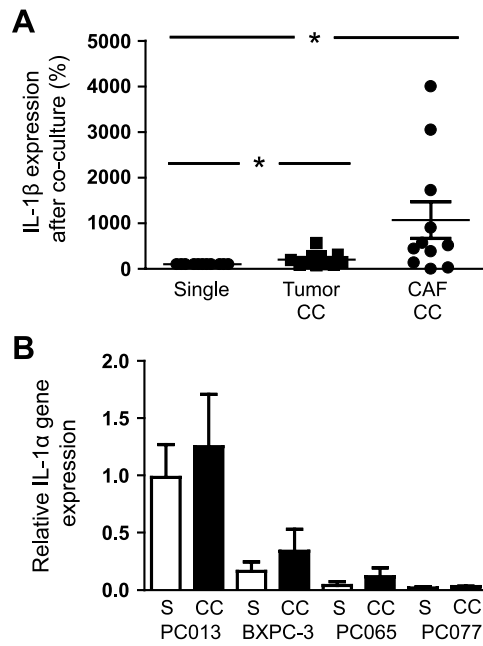

**Figure W2.** Gene expression of IL-1 $\alpha$  and IL-1 $\beta$  in PDAC and CAF cell lines. (A) IL-1 $\beta$  gene expression in cocultured (CC) PDAC and CAF cell lines normalized to respective cell lines cultured alone (S). (B) Relative IL-1 $\alpha$  gene expression profile in PDAC cell lines cultured alone or cocultured with CAFs. The PDAC cell lines PC013, BXPC-3, PC065, and PC077 and the CAF cell lines CAF039, CAF055, and CAF073 were cultured alone or cocultured together for 5 days. \* $P < .05$ , \*\* $P < .005$ , and \*\*\* $P < .001$ .

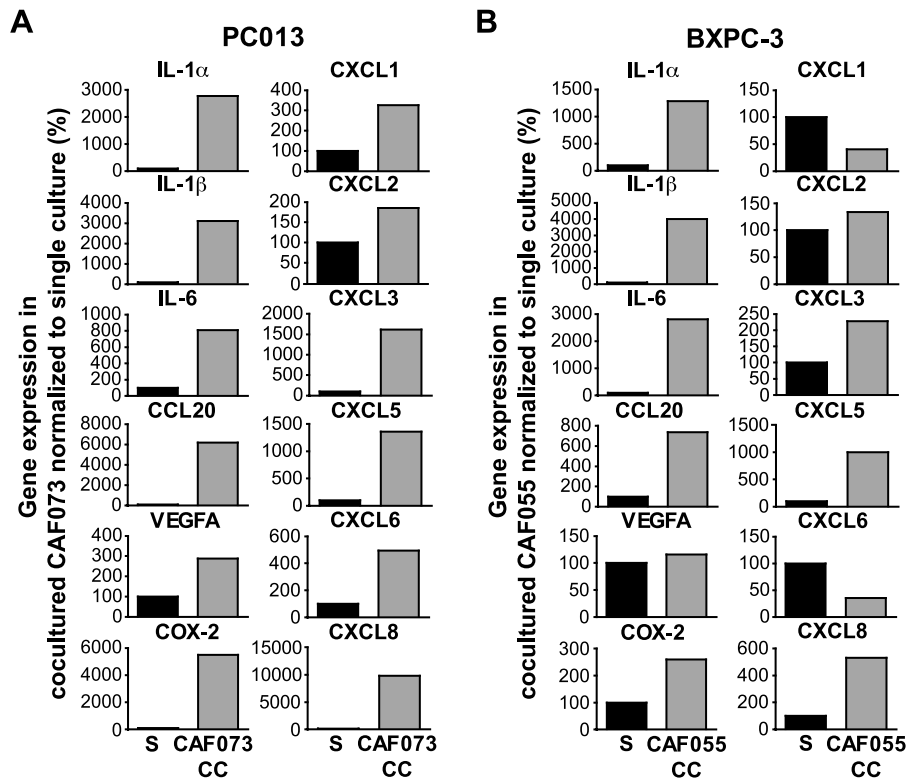

**Figure W3.** The CAF coculture gene profile is universal when cultured with IL-1 $\alpha$  expressing cell lines. RNA was prepared from PDAC cell lines PC013 (IL-1 $\alpha$  high) and BXPC-3 (IL-1 $\alpha$  medium) and CAF cell lines CAF055 and CAF073 after they had been cultured alone or cocultured (PC013/CAF073 [A] and BXPC-3/CAF055 [B], respectively) for 5 days and assessed for expression levels of inflammatory factors ( $n = 2$ ). The gene expression in cocultured (CC) CAFs was normalized to CAFs cultured alone (S).

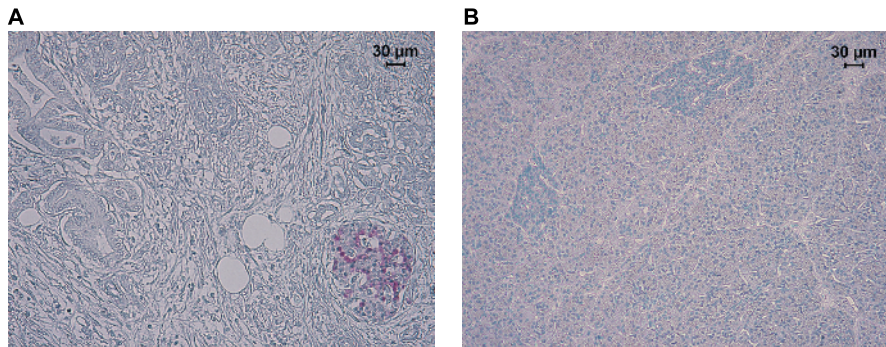

**Figure W4.** IL-1 $\beta$  expression in PDAC and normal pancreatic tissue. PDAC and normal pancreatic tissue samples were fixed and paraffin embedded. The tissue sections from (A) PDAC patients ( $n = 30$ ) and normal pancreatic tissues ( $n = 10$ ) (B) were immunostained with anti-IL-1 $\beta$ , followed by secondary antibodies. The PDAC photograph visualizes the staining (red) for IL-1 $\beta$  in a Langerhans islet. Size bars, 30  $\mu$ m.
